# Supplementary material for: Three-Dimensional Nuclear Telomere Profiling as a Biomarker for Recurrence in Oligodendrogliomas: A Pilot Study
Source: PubMed Central journal article supplement (PMC7696868; doi:10.3390/ijms21228539), 2020-11-12
Supplement: ijms-21-08539-s001.pdf [file ijms-21-08539-s001.pdf]

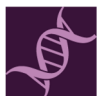

## Supplemental Materials

Figure S1–S8: Title: Combined 3D telomere profiles displaying the distribution of the number of signals (total number of telomeres) versus their intensities (telomere length) at both surgeries, respectively; from patients P2, P3, P4a, P4b, P5, P6, P7, P8, and P10

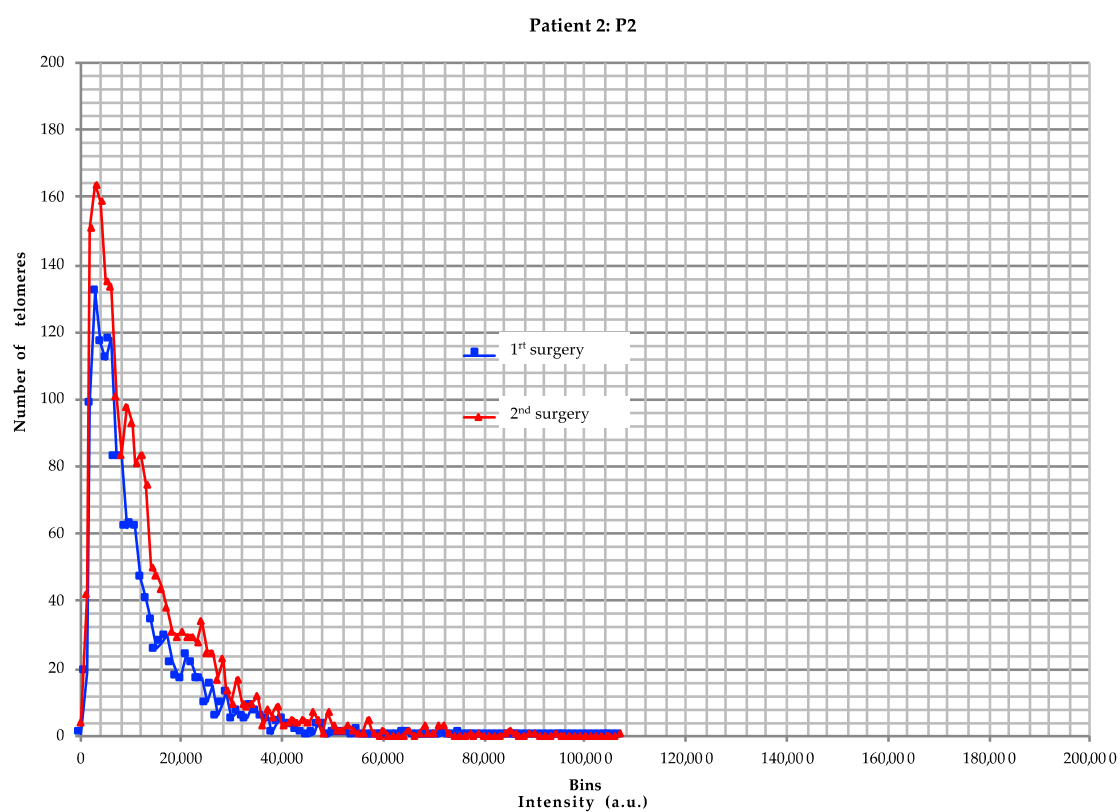

**Figure S1:** Combined 3D telomere profiles displaying the distribution of the number of signals (total number of telomeres) versus their intensities (telomere length) at both surgeries, respectively for patient P2 with short-term recurrence (TTP = 350 days and OS = 2172 days).

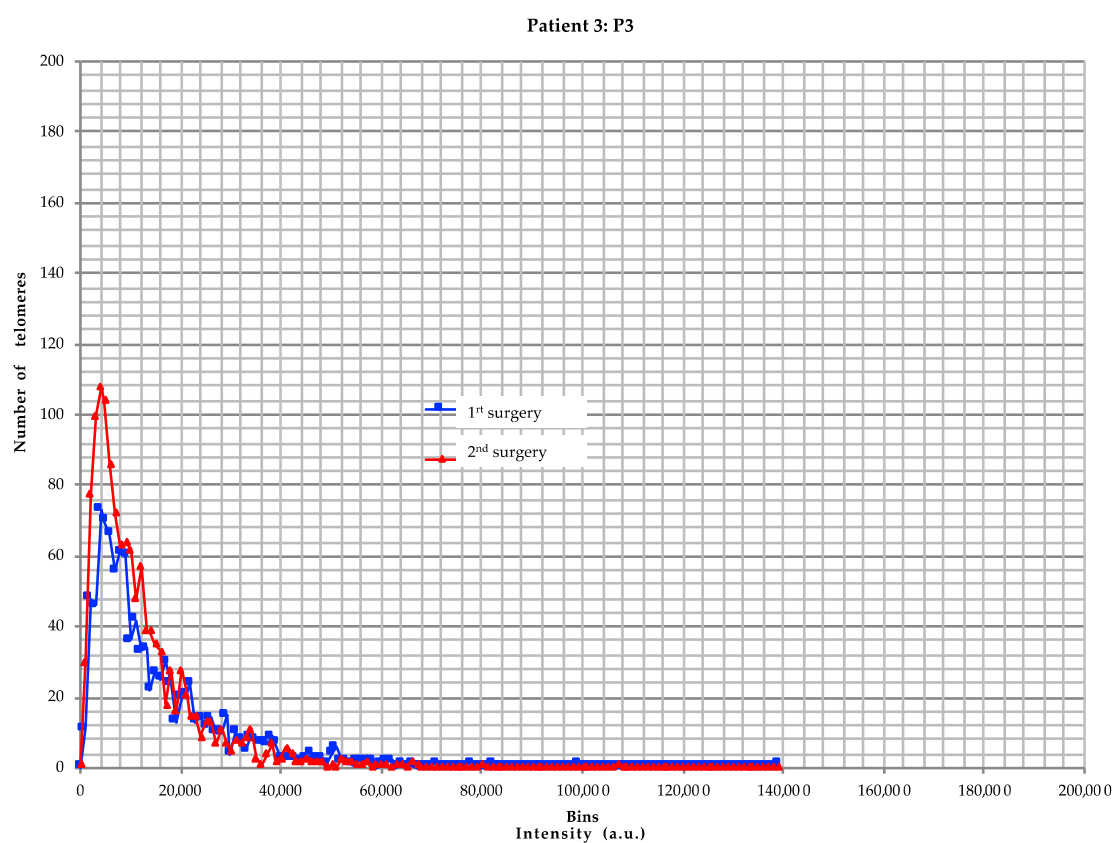

**Figure S2:** Combined 3D telomere profiles displaying the distribution of the number of signals (total number of telomeres) versus their intensities (telomere length) at both surgeries, respectively for patient P3 with short-term recurrence (TTP = 95 days and OS = 721 days).

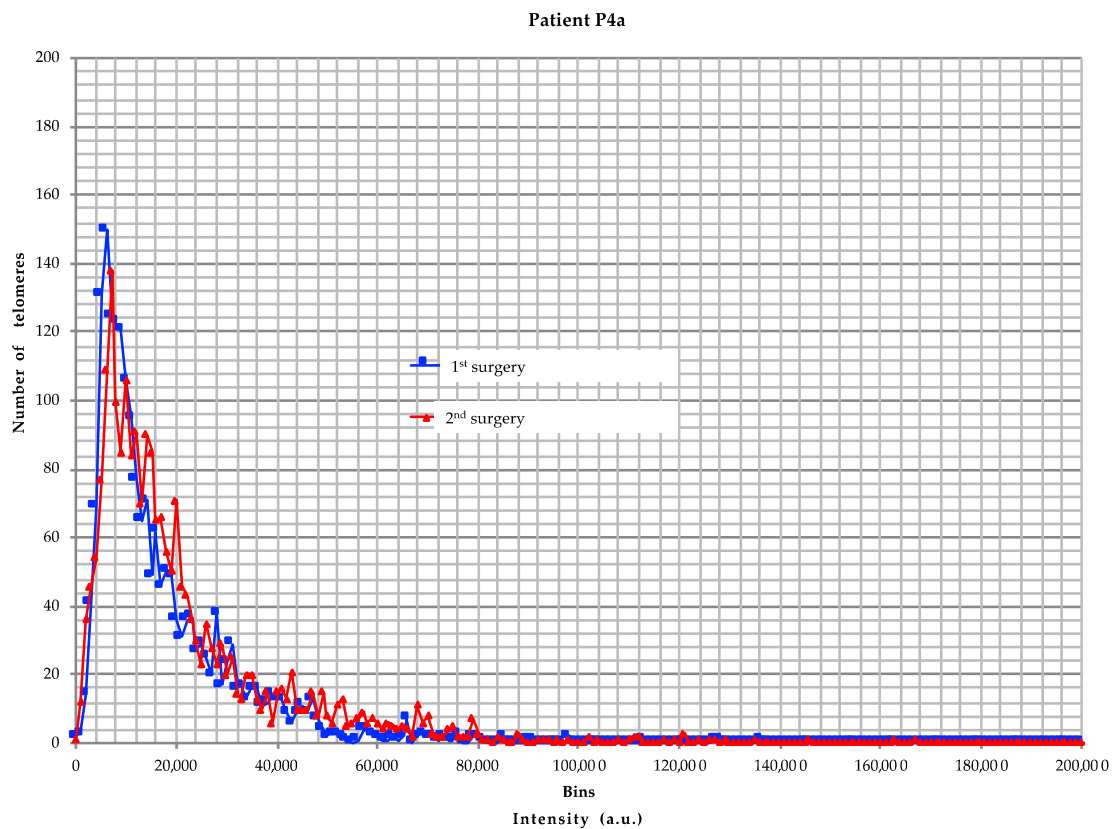

**Figure S3-1:** Combined 3D telomere profiles displaying the distribution of the number of signals (total number of telomeres) versus their intensities (telomere length) at surgery 1 and 2, respectively for patient P4 (P4a) with long-term recurrence (TTP = 930 days).

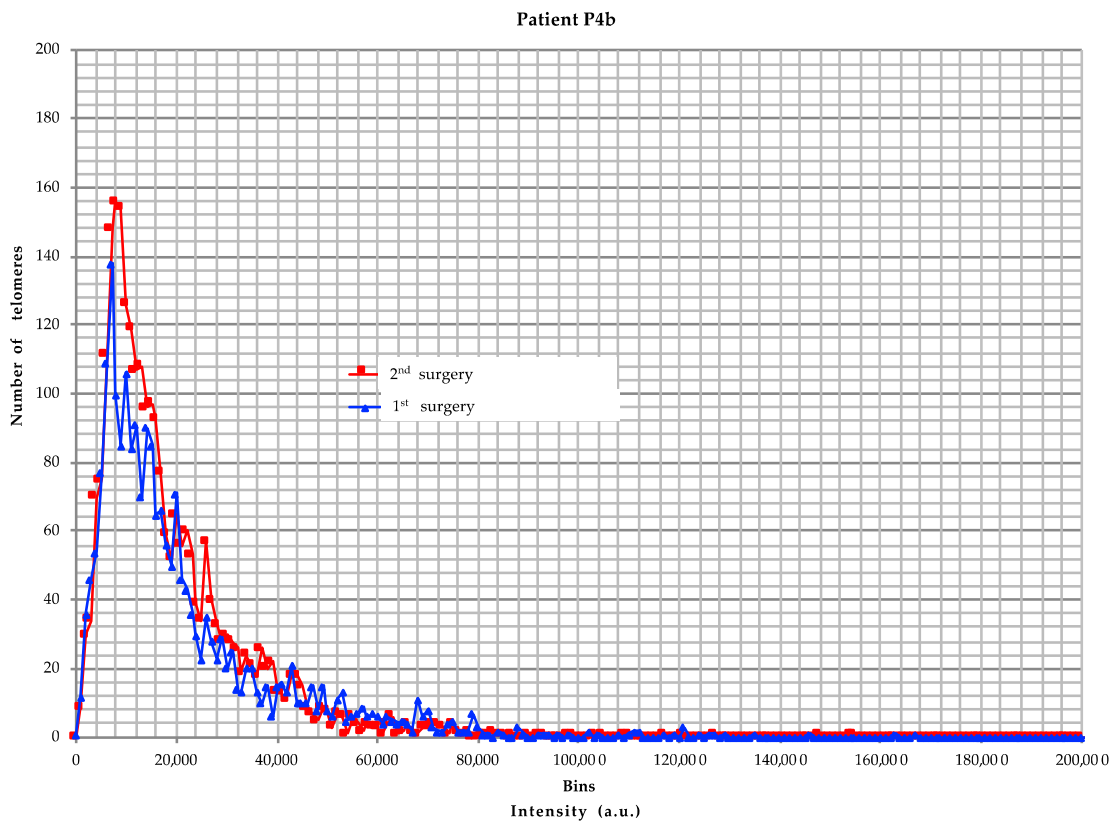

**Figure S3-2:** Combined 3D telomere profiles displaying the distribution of the number of signals (total number of telomeres) versus their intensities (telomere length) at surgery 3 and 4, respectively for patient P4 (P4b) with short term recurrence (TTP = 197 days and OS = 1748 days).

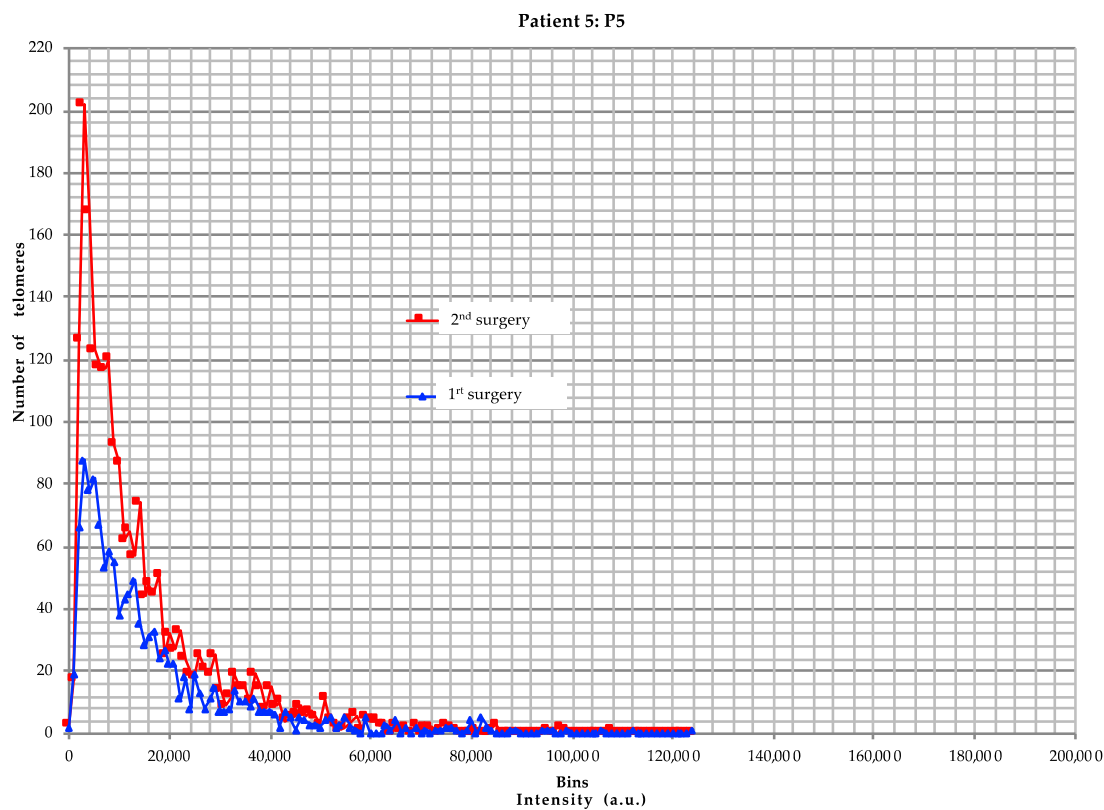

**Figure S4:** Combined 3D telomere profiles displaying the distribution of the number of signals (total number of telomeres) versus their intensities (telomere length) at both surgeries, respectively for patient P5 with short-term recurrence (TTP = 335 and OS = 4242 days)

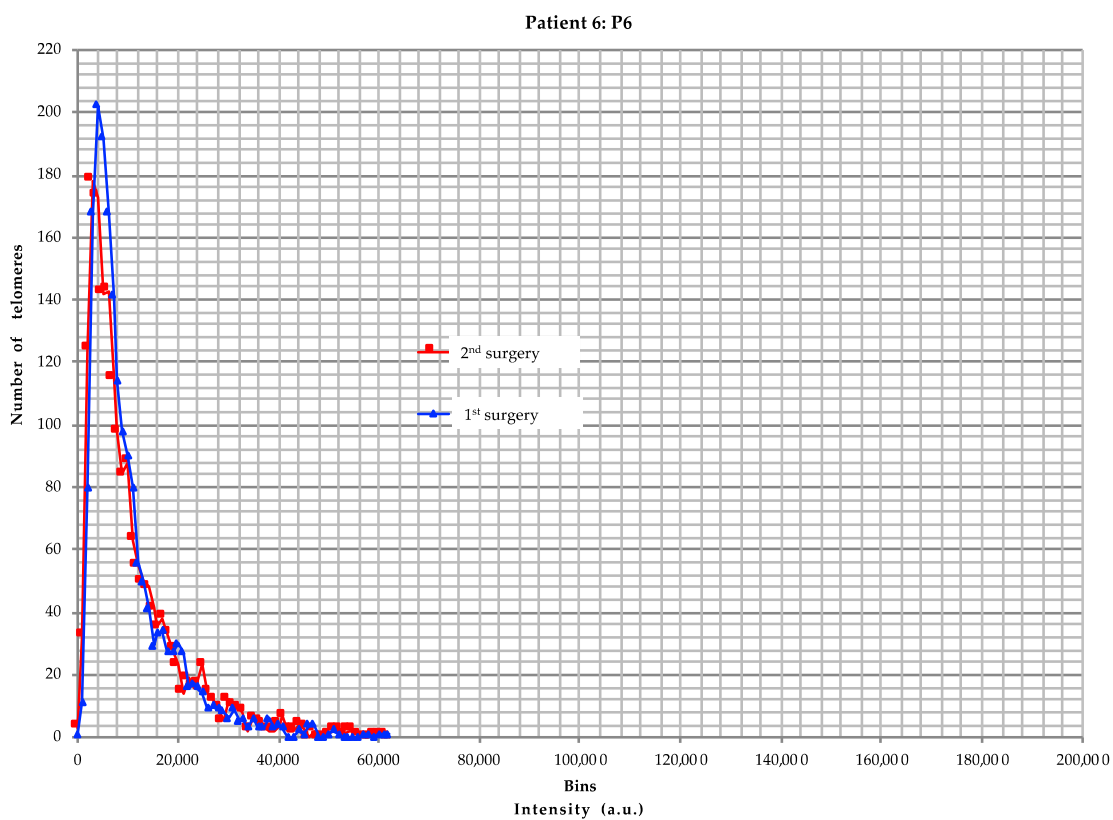

**Figure S5:** Combined 3D telomere profiles displaying the distribution of the number of signals (total number of telomeres) versus their intensities (telomere length) at both surgeries, respectively for patient P6 with long-term recurrence (TTP = 1058 days and OS = 4582 days)

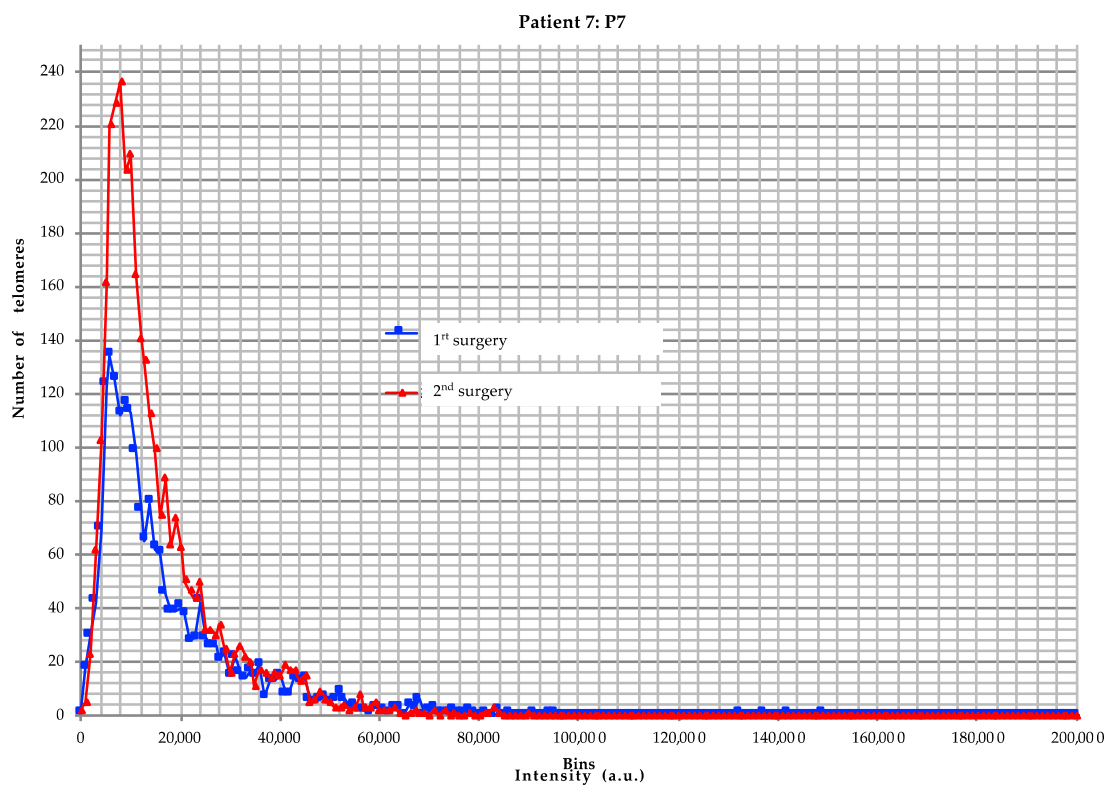

**Figure S6:** Combined 3D telomere profiles displaying the distribution of the number of signals (total number of telomeres) versus their intensities (telomere length) at both surgeries, respectively for patient P7 with short-term recurrence (TTP = 437 and OS = 3141 days)

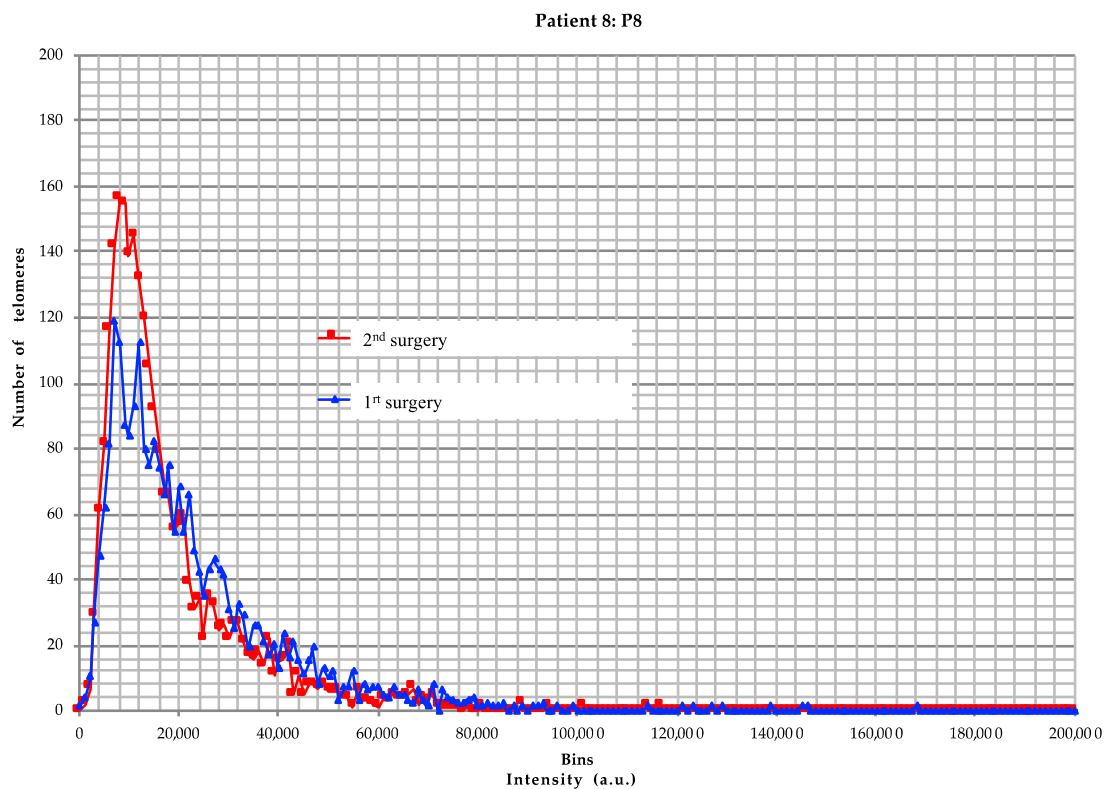

**Figure S7:** Combined 3D telomere profiles displaying the distribution of the number of signals (total number of telomeres) versus their intensities (telomere length) at both surgeries, respectively for patient P8 with short-term recurrence (TTP = 246 days and OS = 500 days)



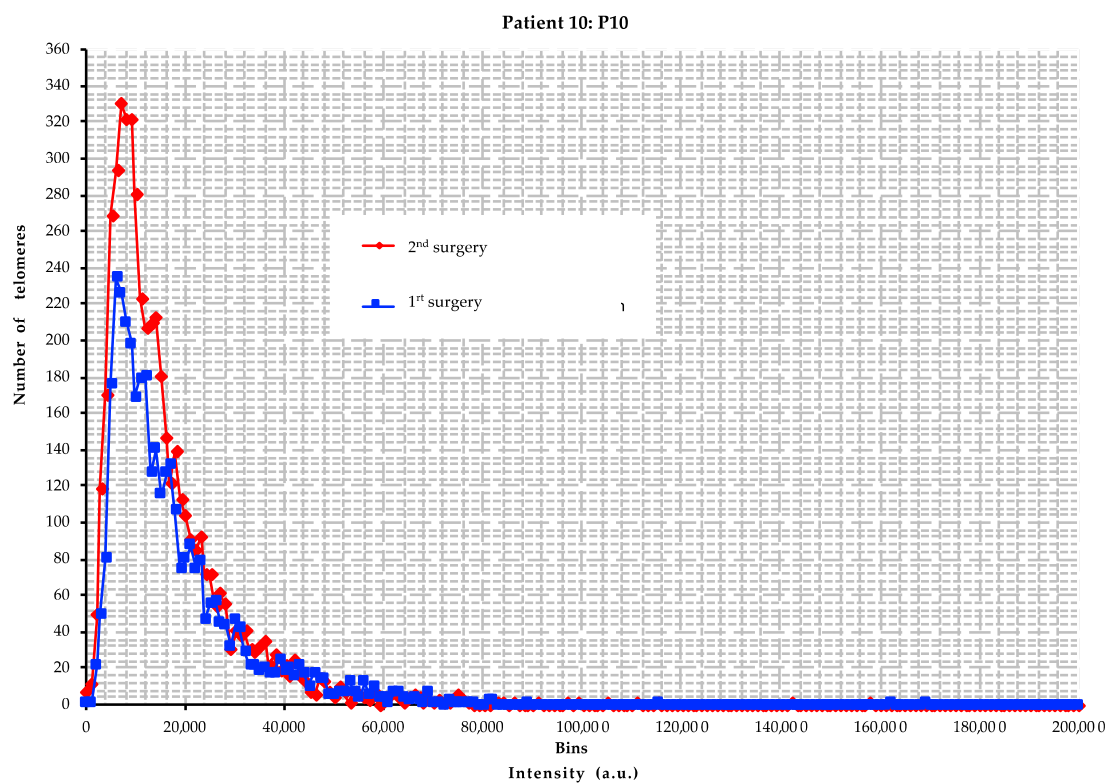

**Figure S8:** Combined 3D telomere profiles displaying the distribution of the number of signals (total number of telomeres) versus their intensities (telomere length) at both surgeries, respectively for patient P10 with short-term recurrence (TTP = 119 days and OS = 735 days)

**Table S1: Comparison between telomeric profile parameters per cell at first surgery and recurrence per each patient**

| Patient        | Level of surgery                                   | Totalnofsignals                |                                                    | Totalnofaggregates             |                                                    | Totalintensity                 |                                                    | AvIntallsignals                |                                                    | Nuclearvolume                  |                                                    | acratio                         |                                                    | Telomere per nuclear volume    |            |
|----------------|----------------------------------------------------|--------------------------------|----------------------------------------------------|--------------------------------|----------------------------------------------------|--------------------------------|----------------------------------------------------|--------------------------------|----------------------------------------------------|--------------------------------|----------------------------------------------------|---------------------------------|----------------------------------------------------|--------------------------------|------------|
|                |                                                    | Mean                           | Std Dev                                            | Mean                           | Std Dev                                            | Mean                           | Std Dev                                            | Mean                           | Std Dev                                            | Mean                           | Std Dev                                            | Mean                            | Std Dev                                            | Mean                           | Std Dev    |
| P1             | 1                                                  | 25.6666667                     | 8.5956418                                          | 2.36666667                     | 2.05918185                                         | 358551.10                      | 115913.801                                         | 14199.4657                     | 2444.1938                                          | 373671.13                      | 148810.16                                          | 3.29                            | 1.3                                                | 0.07587563                     | 0.0309405  |
|                | 2                                                  | 36.3000000                     | 8.1289182                                          | 3.96666667                     | 2.20474931                                         | 453484.00                      | 140191.851                                         | 12460.5273                     | 2829.0921                                          | 972019.67                      | 246068.92                                          | 4.35                            | 1.9                                                | 0.03898138                     | 0.0102518  |
|                | <i>P value</i>                                     | 0.0006                         |                                                    | 0.0087                         |                                                    | 0.1176                         |                                                    | 0.2349                         |                                                    | <.0001                         |                                                    | 1.0000                          |                                                    | 0.9589                         |            |
| P2             | 1                                                  | 43.4545455                     | 9.9375893                                          | 5.36363636                     | 2.72509383                                         | 509486.12                      | 142095.620                                         | 11820.0877                     | 2823.5709                                          | 857304.76                      | 672363.16                                          | 14.51                           | 6.8                                                | 0.07424460                     | 0.0431547  |
|                | 2                                                  | 69.6333333                     | 17.4405064                                         | 7.70000000                     | 3.66859928                                         | 947579.63                      | 262010.421                                         | 13727.3887                     | 2716.3457                                          | 3583927.27                     | 1892694.79                                         | 10.41                           | 4.7                                                | 1.67803312                     | 9.0544901  |
|                | <i>P value</i>                                     | <.0001                         |                                                    | <.0001                         |                                                    | <.0001                         |                                                    | 0.1824                         |                                                    | <.0001                         |                                                    | 1.0000                          |                                                    | 0.0221                         |            |
| P3             | 1                                                  | 30.4857143                     | 12.7056528                                         | 3.31428571                     | 2.60961377                                         | 479234.77                      | 194916.882                                         | 16358.2238                     | 5378.1766                                          | 469016.06                      | 197804.55                                          | 12.83                           | 5.6                                                | 0.06770628                     | 0.0202862  |
|                | 2                                                  | 37.8571429                     | 21.0896446                                         | 4.48571429                     | 3.93604331                                         | 482564.86                      | 260277.395                                         | 13233.7060                     | 3233.1756                                          | 391412.26                      | 405606.97                                          | 7.40                            | 9.3                                                | 0.14362152                     | 0.0677502  |
|                | <i>P value</i>                                     | 0.0099                         |                                                    | 0.0378                         |                                                    | 0.9527                         |                                                    | 0.0212                         |                                                    | 0.5369                         |                                                    | 1.0000                          |                                                    | 0.9089                         |            |
| P4             | 1                                                  | 20.8000000                     | 7.63299589                                         | 2.06000000                     | 1.42715370                                         | 375758.110                     | 127954.378                                         | 18915.4556                     | 5245.02409                                         | 967354.54                      | 418688.097                                         | 1324424.74                      | 13244072.5                                         | 0.02450617                     | 0.01163694 |
|                | 2                                                  | 22.8200000                     | 8.79552228                                         | 2.57000000                     | 1.87085569                                         | 506722.230                     | 222179.793                                         | 22561.0009                     | 6137.65197                                         | 894253.91                      | 557762.655                                         | 8.08                            | 5.0                                                | 0.03157469                     | 0.01560654 |
|                | <i>P value</i>                                     | $P_{1:2}: 0.0727$              |                                                    | $P_{1:2}: 0.0395$              |                                                    | $P_{1:2}: <.0001$              |                                                    | $P_{1:2}: <.0001$              |                                                    | $P_{1:2}: 0.2796$              |                                                    | $P_{1:2}: 0.1581$               |                                                    | $P_{1:2}: 0.0004$              |            |
|                | 3                                                  | 26.5600000                     | 8.76554319                                         | 3.19000000                     | 1.93163457                                         | 520135.670                     | 203616.405                                         | 19910.2126                     | 5523.37587                                         | 641210.20                      | 282388.439                                         | 5.65                            | 2.6                                                | 0.04623971                     | 0.01686107 |
|                | <i>P value</i>                                     | $P_{1:3}<.0001; P_{2:3}0.0009$ |                                                    | $P_{1:3}<.0001; P_{2:3}0.0124$ |                                                    | $P_{1:3}<.0001; P_{2:3}0.5881$ |                                                    | $P_{1:3}0.1900; P_{2:3}0.0005$ |                                                    | $P_{1:3}<.0001; P_{2:3}0.0002$ |                                                    | $P_{1:3}<.01581; P_{2:3}1.0000$ |                                                    | $P_{1:3}<.0001; P_{2:3}<.0001$ |            |
| 4              | 22.5600000                                         | 6.29625510                     | 2.68000000                                         | 1.71080937                     | 398204.960                                         | 123737.368                     | 17980.4619                                         | 4377.17820                     | 1402065.67                                         | 587756.677                     | 17.85                                              | 7.9                             | 0.01900249                                         | 0.01038859                     |            |
| <i>P value</i> | $P_{1:4}0.1178; P_{2:4}0.8170;$<br>$P_{3:4}0.0004$ |                                | $P_{1:4}0.0124; P_{2:4}0.6562;$<br>$P_{3:4}0.0395$ |                                | $P_{1:4}0.3650; P_{2:4}<.0001;$<br>$P_{3:4}<.0001$ |                                | $P_{1:4}0.2180; P_{2:4}<.0001;$<br>$P_{3:4}0.0113$ |                                | $P_{1:4}<.0001; P_{2:4}<.0001;$<br>$P_{3:4}<.0001$ |                                | $P_{1:4}0.1581; P_{2:4}1.0000;$<br>$P_{3:4}1.0000$ |                                 | $P_{1:4}0.0053; P_{2:4}<.0001;$<br>$P_{3:4}<.0001$ |                                |            |
| P5             | 1                                                  | 72.7666667                     | 23.5630970                                         | 8.20000000                     | 5.18884746                                         | 1116903.17                     | 382680.970                                         | 15493.9587                     | 2635.4038                                          | 1658196.77                     | 592780.21                                          | 4.87                            | 1.9                                                | 0.05132022                     | 0.0310878  |
|                | 2                                                  | 42.4000000                     | 12.6779744                                         | 5.53333333                     | 2.31536596                                         | 728975.43                      | 307871.044                                         | 17227.1018                     | 4287.6478                                          | 1857352.00                     | 792582.58                                          | 5.99                            | 3.1                                                | 2.97789855                     | 16.1640546 |
|                | <i>P value</i>                                     | <.0001                         |                                                    | <.0001                         |                                                    | <.0001                         |                                                    | 0.2364                         |                                                    | 0.1424                         |                                                    | 1.0000                          |                                                    | <.0001                         |            |
| P6             | 1                                                  | 62.5000000                     | 21.6615821                                         | 8.26666667                     | 3.99079400                                         | 666316.27                      | 237938.941                                         | 10746.3837                     | 1547.1771                                          | 378377.40                      | 136253.54                                          | 3.15                            | 1.3                                                | 0.17442824                     | 0.0567762  |
|                | 2                                                  | 60.7000000                     | 14.7581655                                         | 7.33333333                     | 3.31489151                                         | 673514.60                      | 218322.641                                         | 11017.1652                     | 2294.3745                                          | 664080.27                      | 181344.48                                          | 7.39                            | 2.3                                                | 0.09534894                     | 0.0248309  |
|                | <i>P value</i>                                     | 0.5592                         |                                                    | 0.1253                         |                                                    | 0.9055                         |                                                    | 0.8532                         |                                                    | 0.0354                         |                                                    | 1.0000                          |                                                    | 0.9121                         |            |
| P7             | 1                                                  | 20.9400000                     | 7.5703035                                          | 2.31000000                     | 1.66178072                                         | 394919.79                      | 202847.524                                         | 19074.7775                     | 7843.9860                                          | 910606.87                      | 542192.02                                          | 8.51                            | 6.0                                                | 0.03071166                     | 0.0189959  |

|     |                |            |            |            |            |           |            |            |            |            |           |        |       |            |           |
|-----|----------------|------------|------------|------------|------------|-----------|------------|------------|------------|------------|-----------|--------|-------|------------|-----------|
|     | 2              | 31.6900000 | 6.9887283  | 3.79000000 | 1.81071446 | 507602.54 | 136890.752 | 16152.7500 | 3074.6429  | 740300.30  | 232178.28 | 8.78   | 3.2   | 0.04562279 | 0.0140165 |
|     | <i>P value</i> | <.0001     |            | <.0001     |            | 0.0007    |            | 0.0007     |            | 0.0221     |           | 1.0000 |       | 0.9697     |           |
| P8  | 1              | 24.1300000 | 6.3048082  | 2.36000000 | 1.62381270 | 553175.12 | 178958.768 | 23332.4983 | 6285.1285  | 965693.13  | 417750.76 | 10.26  | 4.2   | 0.02891512 | 0.0123079 |
|     | 2              | 25.0700000 | 9.4732532  | 2.53000000 | 1.76071037 | 460400.26 | 205900.785 | 18259.8480 | 4898.8354  | 373972.76  | 202418.58 | 6.32   | 3.1   | 0.07794344 | 0.0321275 |
|     | <i>P value</i> | 0.5777     |            | 0.6101     |            | 0.0053    |            | 0.0053     |            | <.0001     |           | 1.0000 |       | 0.9006     |           |
| P9  | 1              | 23.2300000 | 7.9083832  | 2.13000000 | 1.52854985 | 613369.43 | 316858.437 | 27393.3880 | 11235.5051 | 915608.28  | 472247.61 | 11.42  | 7.7   | 0.02921808 | 0.0117040 |
|     | 2              | 23.8600000 | 7.1421639  | 1.95000000 | 1.62912259 | 402310.16 | 158200.513 | 17287.1769 | 4811.8411  | 878065.05  | 360011.83 | 25.97  | 109.2 | 0.03189054 | 0.0164840 |
|     | <i>P value</i> | 0.7090     |            | 0.5893     |            | <.0001    |            | <.0001     |            | 0.6135     |           | 1.0000 |       | 0.9946     |           |
| P10 | 1              | 36.7700000 | 11.9069244 | 3.96000000 | 2.36096197 | 655541.11 | 252227.853 | 17933.2939 | 4325.0578  | 1332570.84 | 403197.65 | 10.39  | 3.9   | 0.02868368 | 0.0090812 |
|     | 2              | 49.8200000 | 21.2728214 | 6.08000000 | 3.26499648 | 800393.92 | 396503.460 | 16197.2864 | 4435.0919  | 1568758.44 | 671182.52 | 9.44   | 5.6   | 0.03364373 | 0.0121374 |
|     | <i>P value</i> | <.0001     |            | <.0001     |            | <.0001    |            | 0.0305     |            | 0.0015     |           | 1.0000 |       | 0.9899     |           |
